# Supplementary material
Source: Springer Nature journal article supplement (https://www.springermedizin.de/resource/supplementary/13229_2013_82_MOESM5_ESM.pdf/9676126)

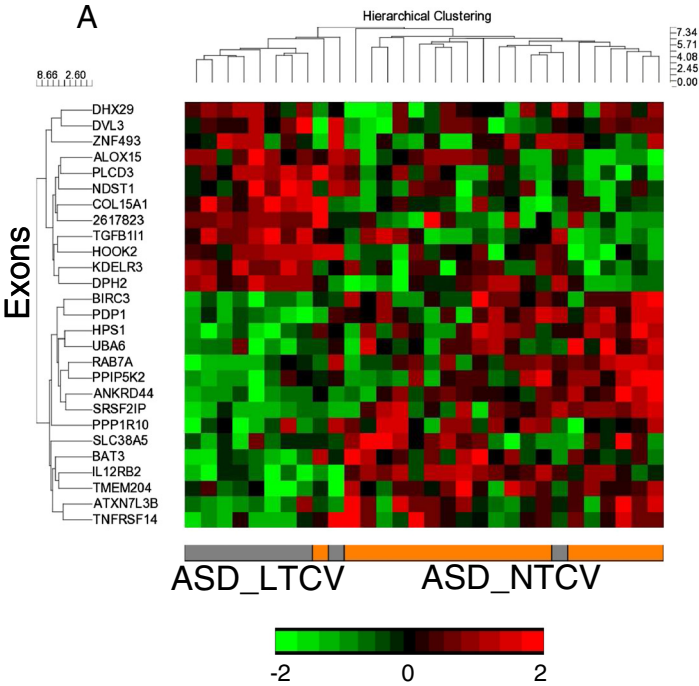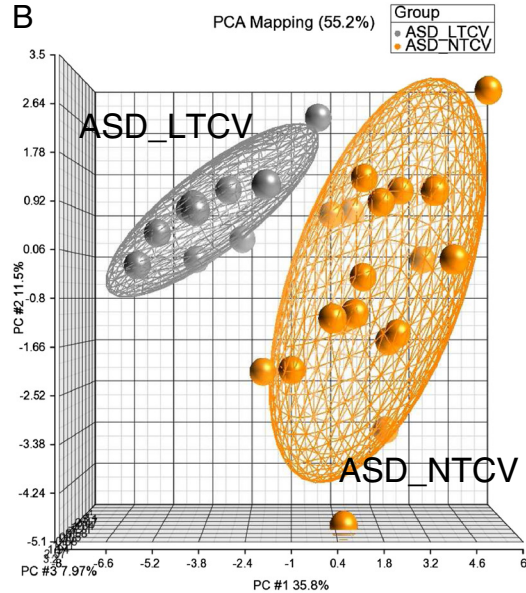

Supplement: MOESM5 [file 9676126]
